# Supplementary material for: The Vaccinia virion: Filling the gap between atomic and ultrastructure
Source: PubMed Central journal article supplement (PMC6336343; doi:10.1371/journal.ppat.1007508), 2019-01-07
Supplement: ppat.1007508.s005.pdf [file ppat.1007508.s005.pdf]

### Supplementary Tables A - I

**Table A.** The XL search engine database (XLDB) was tailored carefully to reflect the expected Vaccinia virion proteome. It was based on the 58-member ‘consistently packaged’ portion of the published virion quantitative proteome histograms (the first 58 data rows in Table S7 of ref. [1]), supplemented with the following proteins considered potentially packaged: 11 of the 16 proteins from the ‘inconsistently packaged’ portion listed in Table S7 of ref. [1] (the remaining five are highlighted cyan in table rows 21 – 25, below); 11 proteins from outside the ‘packaged’ region (rows 10 – 20 highlighted green in the table below) and 6 proteins never detected in the published quantitative proteomes (rows 1 – 6, highlighted yellow in the table below). The resulting XLDB had 86 entries.

Rows 7 – 9 of the table below show proteins from the ‘packaged’ portion in Table S7 of ref. [1] for which either no XL at all, or intra-protein XL (“IntraXL”) only, were detected.

In ref. [1] we performed relative protein quantitation experiments for pairs of virion preparations considered orthogonal in preparation methodology, leading to histograms of protein abundance ratio (x) vs. number of proteins (y). The central portions of these histograms (within a specified distance of 1:1 abundance ratio) were considered to represent bona fide packaged proteins and proteins whose ratios consistently fell within this central portion are denoted “Inside”, in the table below). Proteins with a quant ratio falling outside this portion of histograms (ie. with highly skewed quant ratios) in multiple protein quant experiments (denoted “Outside” in the table below) were formally considered to be protein contaminants in virion preparations. A minimal number of these was included in our XLDB if biologically interesting, to cover the possibility they may be ‘loosely’ packaged. Proteins found ‘outside’ the packaged region in just one out of five quant experiments are denoted “inconsistent” below.

| Row | Protein | Virion quant proteome |                                  | In XLDB | XL detected |              |           |
|-----|---------|-----------------------|----------------------------------|---------|-------------|--------------|-----------|
|     |         | Detected              | ‘Packaged’ portion of histograms |         | None        | IntraXL only | In S1 Fig |
| 1   | E5      | N                     | -                                | Y       |             |              | Y         |
| 2   | F14.5   | N                     | -                                | Y       |             |              | Y         |
| 3   | G5      | N                     | -                                | Y       |             |              | Y         |
| 4   | O3      | N                     | -                                | Y       |             |              | Y         |
| 5   | VENV    | N                     | -                                | Y       |             |              | Y         |
| 6   | I2      | N                     | -                                | Y       | X           |              | N         |
| 7   | A14     | Y                     | Inside                           | Y       | X           |              | N         |
| 8   | D2      | Y                     | Inside                           | Y       |             | X            | Y         |
| 9   | SODL    | Y                     | Inside                           | Y       |             | X            | Y         |
| 10  | A9      | Y                     | Outside                          | Y       |             | X            | Y         |
| 11  | A46     | Y                     | Outside                          | Y       |             | X            | Y         |
| 12  | A11     | Y                     | Outside                          | Y       |             |              | Y         |
| 13  | A19     | Y                     | Outside                          | Y       |             |              | Y         |
| 14  | AT1     | Y                     | Outside                          | Y       |             |              | Y         |
| 15  | E3      | Y                     | Outside                          | Y       |             |              | Y         |
| 16  | GLRX2   | Y                     | Outside                          | Y       |             |              | Y         |
| 17  | H2      | Y                     | Outside                          | Y       |             |              | Y         |
| 18  | J5      | Y                     | Outside                          | Y       |             |              | Y         |
| 19  | M1      | Y                     | Outside                          | Y       |             |              | Y         |
| 20  | N1      | Y                     | Outside                          | Y       |             |              | Y         |
| 21  | DUT     | Y                     | Inconsistent                     | N       | -           | -            | -         |
| 22  | E2      | Y                     | Inconsistent                     | N       | -           | -            | -         |
| 23  | F12     | Y                     | Inconsistent                     | N       | -           | -            | -         |
| 24  | A49     | Y                     | Inconsistent                     | N       | -           | -            | -         |
| 25  | VLTF2   | Y                     | Inconsistent                     | N       | -           | -            | -         |

**Table B.** Partial and complete X-ray crystallographic structures covering the crosslinked portions of proteins in the XL search database. **Black:** Vaccinia proteins. **Green:** Orthologous proteins from other orthopoxviruses. **Gray:** Structural data not used since XL not found in structurally-defined regions.

| Protein     | PDB               | Coverage  | Publication                                                                                                                                                                                                                                                                                                                                                                                                                                                                                                                                                                                                                                                                                                                                                               |
|-------------|-------------------|-----------|---------------------------------------------------------------------------------------------------------------------------------------------------------------------------------------------------------------------------------------------------------------------------------------------------------------------------------------------------------------------------------------------------------------------------------------------------------------------------------------------------------------------------------------------------------------------------------------------------------------------------------------------------------------------------------------------------------------------------------------------------------------------------|
| A14_VACCW   | 4N8V              | 10%       | Liu J, Xiao Z, Ko H.L., Shen M, and Ren E.C. 2014. Activating killer cell immunoglobulin-like receptor 2DS2 binds to HLA-A*11. <i>PNAS</i> <b>111</b> (7) 2662-2667.                                                                                                                                                                                                                                                                                                                                                                                                                                                                                                                                                                                                      |
| A27_VACCW   | 3VOP, 3U59        | 58%, 9%   | Chang T.H., Chang S.J., Hsieh F.L., Ko T.P., Lin C.T., Ho M.R., Wang I, Hsu S.T.D., Guo R.T., Chang W, Wang A.H.J. 2013. Crystal Structure of Vaccinia Viral A27 Protein Reveals a Novel Structure Critical for Its Function and Complex Formation with A26. <i>Plos Pathog</i> <b>9</b> e1003563-e1003563.<br>Kaefer T, Matho M.H., Meng X, Crickard L, Schlossmn A, Xiang Y, Crotty Y, Peters B, Zajonc D.M. 2016. Linear Epitopes in the Vaccinia Virus A27 Are Targets of Protective Antibodies induced by Vaccination against Smallpox. <i>J. Virol</i> <b>90</b> 4334-4345.                                                                                                                                                                                         |
| A46_VACCW   | 4LQK              | 60%, 35%  | Fedosyuk S, Grishkovskaya I, de Almeida Ribeiro E, Skern T. 2014. Characterization and Structure of the Vaccinia Virus NF-kappa B Antagonist A46. <i>J. Biol. Chem</i> <b>289</b> 3749-3762.<br>Fedosyuk S, Bezerra G.A, Radakovics K, Smith T.K., Sammito M, Bobik N, Round A, Ten Eyck L.F., Djinnovic-Carugo K, Uson I, Skern T. 2016. Vaccinia Virus Immunomodulator A46: A Lipid and Protein-Binding Scaffold for Sequestering Host TIR-Domain Proteins. <i>PLoS Pathog</i> <b>12</b> e1006079-e1006079.                                                                                                                                                                                                                                                             |
| CAHH_VACCW  | 4E90              | 88%       | Matho M.H., Maybeno M, Benhnia M.R., Becker D, Meng X, Xiang Y, Crotty S, Peters B, Zajonc D.M. 2012. Structure and Biochemical Characterization of the Vaccinia Virus Envelope Protein D8 and Its Recognition by the Antibody LA5. <i>J Virol</i> <b>86</b> 8080-8058.                                                                                                                                                                                                                                                                                                                                                                                                                                                                                                   |
| DUSP_VACCW  | 3CM3, 2Q05, 2RF6  | 100%      | Koksai A.C., Nardozzi J.D., Cingolani G. 2009. Dimeric Quaternary Structure of the Prototypical Dual Specificity Phosphatase VH1. <i>J. Biol. Chem</i> <b>284</b> 10129-10137                                                                                                                                                                                                                                                                                                                                                                                                                                                                                                                                                                                             |
| GLRX2_VACCW | 2G2Q              | 100%      | Su H.P., Lin D.Y., Garboczi D.N. 2006. The structure of G4, the poxvirus disulfide oxidoreductase essential for virus maturation and infectivity. <i>J. Virol</i> <b>80</b> 7706-7713.                                                                                                                                                                                                                                                                                                                                                                                                                                                                                                                                                                                    |
| H3_VACCW    | 5EJ0              | 73%       | Singh K, Gittis A.G., Gitti R.K., Ostazeski S.A., Su H.P., Garboczi D.N. 2016. The Vaccinia Virus H3 Envelope Protein, a Major Target of Neutralizing Antibodies Exhibits a Glycosyltransferase Fold and Binds UDP-Glucose. <i>J. Virol</i> <b>90</b> 5020-5030.                                                                                                                                                                                                                                                                                                                                                                                                                                                                                                          |
| L1_VACCW    | 1YPY, 2I9L, 4U6H  | 74%       | Su H.P., Garman S.C., Allison T.J., Fogg C, Moss B, Garboczi D.N. 2005. The 1.51 Å-angstrom structure of the poxvirus L1 protein, a target of potent neutralizing antibodies. <i>PNAS</i> <b>102</b> 4240-4245.<br>Su H.P., Golden J.W., Gittis A.G., Hooper J.W., Garboczi D.N. 2007. Structural basis for the binding of the neutralizing antibody, 7D11, to the poxvirus L1 protein. <i>Virology</i> <b>368</b> 331-341.<br>Kaefer T, Meng X, Matho M.H., Schlossman A, Li S, Sela-Culang I, Ofnan Y, Buller M, Crump R.W., Parker S, Frazier A, Crotty S, Zajonc D.M., Peters B, Xiang Y. 2014. Potent neutralization of vaccinia virus by divergent murine antibodies targeting a common site of vulnerability in L1 protein. <i>J. Virol</i> <b>88</b> 11339-11355. |
| MCE_VACCW   | 1AV6              | 100%      | Hodel A.E., Gershon P.D., Shi X, Quiocho F.A. 1996. The 1.85 Å structure of vaccinia protein VP39: a bifunctional enzyme that participates in the modification of both mRNA ends. <i>Cell (Cambridge,Mass.)</i> <b>85</b> 247-256.                                                                                                                                                                                                                                                                                                                                                                                                                                                                                                                                        |
| MCEL_VACCW  | 4CKB              | 100%      | Kyrieleis O.J.P., Chang J, De La Pena M, Shuman S, Cusack S. 2014. Crystal Structure of Vaccinia Virus mRNA Capping Enzyme Provides Insights Into the Mechanism and Evolution of the Capping Apparatus. <i>Structure</i> <b>22</b> 452.                                                                                                                                                                                                                                                                                                                                                                                                                                                                                                                                   |
| MCES_VACCW  | 4CKB              | 100%      | Kyrieleis O.J.P., Chang J, De La Pena M, Shuman S, Cusack S. 2014. Crystal Structure of Vaccinia Virus mRNA Capping Enzyme Provides Insights Into the Mechanism and Evolution of the Capping Apparatus. <i>Structure</i> <b>22</b> 452.                                                                                                                                                                                                                                                                                                                                                                                                                                                                                                                                   |
| PAP1_VACCW  | 2GA9, 3ERC        | 98%, 100% | Moure C.M., Bowman B.R., Gershon P.D., Quiocho F.A. 2006. Crystal structures of the vaccinia virus polyadenylate polymerase heterodimer: insights into ATP selectivity and processivity. <i>Mol Cell</i> <b>22</b> 339-349.<br>Li C, Li H, Zhou S, Sun E, Yoshizawa J, Poulos T.L., Gershon P.D. 2009. Polymerase Translocation with Respect to Single-Stranded Nucleic Acid: Looping or Wrapping of Primer around a Poly(A) Polymerase. <i>Structure</i> <b>17</b> 680-689.                                                                                                                                                                                                                                                                                              |
| TOP1_VACCW  | 1VCC, 1A41        | 25%, 75%  | Sharma A, Hanai R, Mondragon A. 1994. Crystal structure of the amino-terminal fragment of vaccinia virus DNA topoisomerase I at 1.6 Å resolution. <i>Structure</i> <b>2</b> 767-777.<br>Cheng C, Kussie P, Pavletich N, Shuman S. 1998. Conservation of structure and mechanisms between eukaryotic topoisomerase I and site-specific recombinases. <i>Cell (Cambridge,Mass.)</i> <b>92</b> 841-850.                                                                                                                                                                                                                                                                                                                                                                      |
| VE03_VACCW  | 1OYI              | 43%       | Kahmann J.D., Wecking D.A., Putter V, Lowenhaupt K, Kim Y.-G., Schmieler P, Oschkinat H, Rich A, Schade M. 2004. The solution structure of the N-terminal domain of E3L shows a tyrosine conformation that may explain its reduced affinity to Z-DNA in vitro. <i>PNAS</i> <b>101</b> 2712-2717.                                                                                                                                                                                                                                                                                                                                                                                                                                                                          |
| GLRX1_ECTVM | 2HZE [Ectromeila] | 100%      | Bacik J.P., Hazes B. 2007. Crystal Structures of a Poxviral Glutaredoxin in the Oxidized and Reduced States Show Redox-correlated Structural Changes. <i>J Mol Bio</i> <b>368</b> 1545-1558.                                                                                                                                                                                                                                                                                                                                                                                                                                                                                                                                                                              |
| PROF_MONPZ  | 4QWO [Monkeypox]  | 100%      | Minasov G, Shuvalova L, Dubrovskaya I, Flores K, Grimshaw S, Kwon K, Anderson W.F. 1.52 Å-angstrom Crystal Structure of A42R Profilin-like Protein from Monkeypox Virus Zaire-96-1-16. To be published.                                                                                                                                                                                                                                                                                                                                                                                                                                                                                                                                                                   |

**Table C.** Numbers of crosslinking ions detected for the three predicted fragments of protein p4a and two predicted fragments of protein p4b. Bold red: Values charted on Y axis of Fig. 5b.

| Line       |                                              | Fragment 1   | Fragment 2  | Fragment 3   |
|------------|----------------------------------------------|--------------|-------------|--------------|
| <b>P4a</b> |                                              |              |             |              |
| 1          | #Unique XL ions                              | 437          | 13          | 287          |
| 2          | Line #1 x DFscore for each ion               | 2706         | 30          | 1331         |
| 3          | fragment length (aa)                         | 614          | 83          | 194          |
| 4          | <b>Line #2 normalized to fragment length</b> | <b>4.41</b>  | <b>0.36</b> | <b>6.86</b>  |
| 5          | #Lys plus fragment N-terminus                | 36           | 3           | 17           |
| 6          | <b>Line #2 normalized to line 5</b>          | <b>75.17</b> | <b>10</b>   | <b>78.29</b> |
| <b>P4b</b> |                                              |              |             |              |
| 1          | #Unique XL ions                              | 4            | 375         | -            |
| 2          | Line #1 x DFscore for each ion               | 4            | 1358        | -            |
| 3          | Fragment length (aa)                         | 61           | 582         | -            |
| 4          | <b>Line #2 normalized to fragment length</b> | <b>0.066</b> | <b>2.33</b> | -            |
| 5          | #Lys plus fragment N-terminus                | 3            | 28          | -            |
| 6          | <b>Line #2 normalized to line 5</b>          | <b>1.33</b>  | <b>48.5</b> | -            |

**Table D.** EFC interactions noted previously [2] and in the current study. Column 3: Previously known interactions, with those confirmed by crosslinking in red font. Column 4: All transmembrane (“TM”) protein crosslinking partners for EFC proteins, with EFC partners indicated in red font. Four EFC proteins (A16, G9, J5 and L1) are known to be myristoylated [3].

| Protein | Comment (ref. [2])         | Known interaction (ref. [2]) | XL partners (TM)             |
|---------|----------------------------|------------------------------|------------------------------|
| A16     | Paralog of G9, J5          | Binds G9                     | ATI                          |
| A21     |                            | -                            | CAHH                         |
| A28     |                            | Binds H2                     | H3                           |
| F9      | Structurally related to L1 | -                            | <b>J5</b>                    |
| G3      |                            | <b>Binds L5</b>              | <b>L5 (DFscore=10)</b>       |
| G9      | Paralog of A16, J5         | Binds A16                    | ATI, <b>H2</b> , H3, (A26).  |
| H2      |                            | Binds A28                    | ATI, <b>G9</b>               |
| J5      | Paralog of A16, G9         | -                            | ATI, <b>F9</b>               |
| L1      | Structurally related to F9 | -                            | -                            |
| L5      |                            | <b>Binds G3</b>              | H3, <b>G3 (DFscore=10)</b> . |
| O3      |                            |                              | H3                           |

**Table E.** Top DFscoring inter-protein XL in the dataset, ordered by descending DFscore. Acc, Pos, #PepSeqs, #ions, BR: Accession, position in protein sequence, number of distinct peptide sequences in which the XL was detected, number of distinct ions via which it was detected, and biological rationality (Y/N), respectively. An XL is defined as a unique combination of Acc1/Pos1 and Acc2/Pos2.

| Acc1        | Acc2        | Pos1 | Pos2 | #pepSeqs1 | #pepSeqs2 | #ions | DFscore | BR |
|-------------|-------------|------|------|-----------|-----------|-------|---------|----|
| P4B_VACCW   | P4A_VACCW   | 563  | 876  | 3         | 4         | 43    | 475     | Y  |
| P4B_VACCW   | P4A_VACCW   | 407  | 736  | 2         | 2         | 18    | 69      | Y  |
| P4B_VACCW   | P4A_VACCW   | 393  | 736  | 2         | 2         | 17    | 46      | Y  |
| H3_VACCW    | A27_VACCW   | 224  | 98   | 4         | 4         | 13    | 35      | Y  |
| P4A_VACCW   | P4B_VACCW   | 788  | 568  | 2         | 2         | 14    | 34      | Y  |
| RAP94_VACCW | NTP1_VACCW  | 177  | 175  | 2         | 1         | 8     | 30      | Y  |
| A17_VACCW   | H3_VACCW    | 36   | 224  | 4         | 4         | 8     | 30      | Y  |
| P4A_VACCW   | P4B_VACCW   | 876  | 567  | 2         | 2         | 7     | 27      | Y  |
| I1_VACCW    | E8_VACCW    | 178  | 201  | 2         | 2         | 3     | 24      |    |
| VP8_VACCW   | A12_VACCW   | 240  | 75   | 3         | 2         | 6     | 22      |    |
| RAP94_VACCW | RP132_VACCW | 577  | 790  | 2         | 2         | 6     | 22      | Y  |
| I7_VACCW    | H3_VACCW    | 364  | 147  | 2         | 2         | 6     | 16      |    |
| H3_VACCW    | ETF2_VACCW  | 1    | 381  | 1         | 1         | 1     | 16      | N  |
| P4A_VACCW   | ETF1_VACCW  | 736  | 308  | 1         | 1         | 7     | 15      |    |
| MCEL_VACCW  | RP18_VACCW  | 136  | 47   | 2         | 2         | 4     | 12      | Y  |
| VP8_VACCW   | A12_VACCW   | 240  | 63   | 2         | 2         | 5     | 12      |    |
| A27_VACCW   | A17_VACCW   | 98   | 36   | 2         | 2         | 7     | 12      | Y  |
| G9_VACCW    | MCE_VACCW   | 58   | 226  | 1         | 1         | 2     | 12      | N  |
| G3_VACCW    | L5_VACCW    | 111  | 109  | 1         | 1         | 2     | 11      | Y  |
| A26_VACCW   | A27_VACCW   | 415  | 48   | 2         | 2         | 4     | 11      | Y  |
| VF17_VACCW  | A4_VACCW    | 74   | 274  | 3         | 3         | 7     | 11      |    |
| RP18_VACCW  | RP132_VACCW | 33   | 1117 | 3         | 3         | 7     | 11      | Y  |
| VF17_VACCW  | P4A_VACCW   | 74   | 508  | 3         | 3         | 5     | 10      |    |
| VP8_VACCW   | A12_VACCW   | 212  | 75   | 1         | 1         | 3     | 10      |    |
| VP8_VACCW   | A12_VACCW   | 212  | 63   | 1         | 1         | 2     | 9       |    |
| A12_VACCW   | VP8_VACCW   | 75   | 204  | 1         | 2         | 3     | 8       |    |
| P4A_VACCW   | P4B_VACCW   | 876  | 563  | 1         | 2         | 3     | 8       | Y  |
| P4A_VACCW   | P4B_VACCW   | 772  | 471  | 1         | 1         | 1     | 8       | Y  |
| P4B_VACCW   | ETF1_VACCW  | 471  | 308  | 1         | 1         | 2     | 8       |    |
| H3_VACCW    | A27_VACCW   | 147  | 98   | 1         | 1         | 2     | 7       | Y  |
| A12_VACCW   | VP8_VACCW   | 88   | 240  | 1         | 1         | 3     | 7       |    |
| A30_VACCW   | P4A_VACCW   | 49   | 876  | 1         | 1         | 1     | 7       |    |
| E8_VACCW    | A12_VACCW   | 1    | 167  | 1         | 1         | 2     | 6       |    |
| RP07_VACCW  | RP132_VACCW | 36   | 979  | 1         | 1         | 3     | 6       | Y  |
| A26_VACCW   | I3_VACCW    | 415  | 189  | 1         | 1         | 1     | 6       |    |
| ATI_VACCW   | P4A_VACCW   | 572  | 876  | 1         | 1         | 2     | 6       |    |
| A17_VACCW   | H3_VACCW    | 36   | 235  | 1         | 1         | 2     | 6       | Y  |





**Table H.** Crosslinked peptides in the dataset spanning AG| sites known to be cleaved during virion maturation. “Row”: Row of [S1 Table A](#). ‘Pos’: Crosslinking position. “XLSE”: Crosslink search engine. Red font (columns 2 and 4): Virion proteins known to be proteolytically processed. Columns 6 and 7, underlines/red font: Known AG| cleavage sites. Green font: Crosslinked residues.

| Row      | Prot1 | Pos1 | Prot2 | Pos2 | XL pep1                               | XL pep2                               | Expt#    | XLer | Cleavage           | XLSE     |
|----------|-------|------|-------|------|---------------------------------------|---------------------------------------|----------|------|--------------------|----------|
| 1881     | A17   | 22   | A17   | 23   | YYNMLDDFSAGAGVLDKDLFTEE               | YYNMLDDFSAGAGVLDKDLFTEE               | 67       | EDC  | Tryp/GluC          | Kojak    |
| 1882     | A17   | 22   | A17   | 11   | YYNMLDDFSAGAGVLDKDLFTEE               | YYNMLDDFSAGAGVLDKDLFTEE               | 67       | EDC  | Tryp/GluC          | Kojak    |
| 1883     | A17   | 22   | A17   | 27   | YYNMLDDFSAGAGVLDKDLFTEE               | YYNMLDDFSAGAGVLDKDLFTEE               | 67       | EDC  | Tryp/GluC          | Kojak    |
| 1884     | A17   | 22   | A17   | 21   | YYNMLDDFSAGAGVLDKDLFTEE               | YYNMLDDFSAGAGVLDKDLFTEE               | 67       | EDC  | Tryp/GluC          | Kojak    |
| 2962     | A17   | 180  | F8    | 1    | SINVTIPEQYTCNKPYTAGNK                 | MEGSK                                 | 17       | DSS  | Trypsin            | PP       |
| 4092     | A17   | 180  | A17   | 187  | SINVTIPEQYTCNKPYTAGNKVDVDIPTFNSLNTDDY | SINVTIPEQYTCNKPYTAGNKVDVDIPTFNSLNTDDY | 17,50,51 | DSS  | Trypsin, Tryp/GluC | Kojak(3) |
| 4296     | A17   | 180  | A17   | 180  | SINVTIPEQYTCNKPYTAGNK                 | SINVTIPEQYTCNKPYTAGNK                 | 17       | DSS  | Trypsin            | ECL2     |
| 980,1012 | VP8   | 34   | VP8   | 36   | YDDLQMVIAGAKSKFPR                     | YDDLQMVIAGAKSKFPR                     | 57,69    | DSS  | Trypsin, Tryp/GluC | Kojak(4) |
| 3633     | A12   | 41   | A12   | 61   | NLLAQIGGDAAVKGGNNLNSQTDVTAGACDTKSK    | NLLAQIGGDAAVKGGNNLNSQTDVTAGACDTKSK    | 25       | DSS  | Trypsin            | ECL2     |
| 3609     | G7    | 1    | G7    | 240  | MAAEQR                                | GIDTSNNIAEYIAGLKIEIEKVEK              |          |      |                    | ECL2     |
| 632      | G7    | 240  | ETF1  | 197  | YIAGLKIE                              | IISRGKK                               | 57       | DSS  | Trypsin            | xProphet |
| 4009     | G7    | 240  | J1    | 83   | KGIDTSNNIAEYIAGLKIEIEK                | KLFNKVPIVTDGR                         | 30,51    | DSS  | Trypsin            | PP(2)    |

**Table I.** Parameters used with crosslink search engines.

|                                 | <b>PP</b>                            | <b>pLINK</b>                | <b>Kojak</b>                | <b>xQuest</b>              | <b>ECL</b>               | <b>ECL2</b>                 |
|---------------------------------|--------------------------------------|-----------------------------|-----------------------------|----------------------------|--------------------------|-----------------------------|
| Instrument fragmentation method | HCD                                  | HCD                         | HCD                         | CID                        | CID                      | CID                         |
| Selected instrument method type | 'ESI-Q-high-res'                     | 'HCD' From instrument.ini   | "O" for Orbitrap'           | -                          | -                        | -                           |
| Format conversion to            | mgf                                  | mgf                         | mzML                        | mzXML                      | mzXML                    | mzXML                       |
| Search DB                       | Vaccinia86 + xDecoy                  | Vaccinia86                  | Vaccinia86 + xDecoy         | Vaccinia86 + xDecoy        | Vaccinia86               | Vaccinia86 + xDecoy         |
| Cleavage specificity            | From program menu                    | From enzyme.ini file        | Based on params provided    | From xquest.def file       | Trypsin only             | Trypsin only                |
| Allowed missed cleavages: Up to | 2                                    | 2                           | 2                           | 2                          | 2                        | 2                           |
| Fixed mods                      | Carbamidomethyl C/none *             | Carbamidomethyl C/none *    | Carbamidomethyl C/none *    | Carbamidomethyl C/none *   | Carbamidomethyl C/none * | Carbamidomethyl C/none *    |
| Variable mods                   | Oxidation M, Deamidation NQ          | Oxidation M, Deamidation NQ | Oxidation M, Deamidation NQ | None                       | None                     | Oxidation M, Deamidation NQ |
| Parent tolerance (ppm)          | 15                                   | 15                          | 15                          | 10                         | 10                       | 10                          |
| fragment tolerance              | 25 ppm                               | 25 ppm                      | 25 ppm                      | 0.5 Th                     | 0.5 Th                   | 0.5 Th                      |
| Max #varmods per peptide        | 2                                    | 2                           | 2                           | 2                          | None                     | 2                           |
| Crosslinker DSS or BS3          | DSS isotopic pair with a 12 Da shift | from xlink.ini              | configuration file          | "Xmm.def" and "xquest.def" | Entered manually         | Entered manually            |
| Other crosslinkers              | Imputed as user defined parameters   | from xlink.ini              | configuration file          | "Xmm.def" and "xquest.def" | Entered manually         | Entered manually            |
| Ion charge state                | -                                    | -                           | -                           | "Xmm.def" and "xquest.def" | Parameter.def**          | Parameter.def**             |
| Post-processing                 | -                                    | -                           | Percolator                  | xProphet                   | Percolator               | Percolator                  |

\* For samples with iodoacetamide/no treatment

\*\* 'ms1 charge', 'common ion charge' and 'xlink ion charge' were adjusted manually for highest scores.

Vaccinia86 = FASTA formatted search DB containing 86 Vaccinia protein sequences

xDecoy = Shuffled decoy database generated by xQuest

pLINK and ECL each generated their own internal decoy DB



## References

1. Ngo T, Mirzakhanyan Y, Gershon PD. Protein primary structure of the Vaccinia virion at increased resolution. *J Virol*. 2016.
2. Moss B. Poxvirus cell entry: how many proteins does it take? *Viruses*. 2012;4(5):688-707. Epub 2012/07/04. doi: 10.3390/v4050688 v4050688 [pii]. PubMed PMID: 22754644; PubMed Central PMCID: PMC3386626.
3. Condit RC, Moussatche N, Traktman P. In a nutshell: structure and assembly of the vaccinia virion. In: Maramorosch K, Shatkin J, editors. *Advances in Virus Research*. 66: Elsevier; 2006. p. 31–124.
